# Supplementary material
Source: PubMed Central journal article supplement (PMC3694755)
Supplement: NIHMS477924-supplement-1.pdf [file NIHMS477924-supplement-1.pdf]

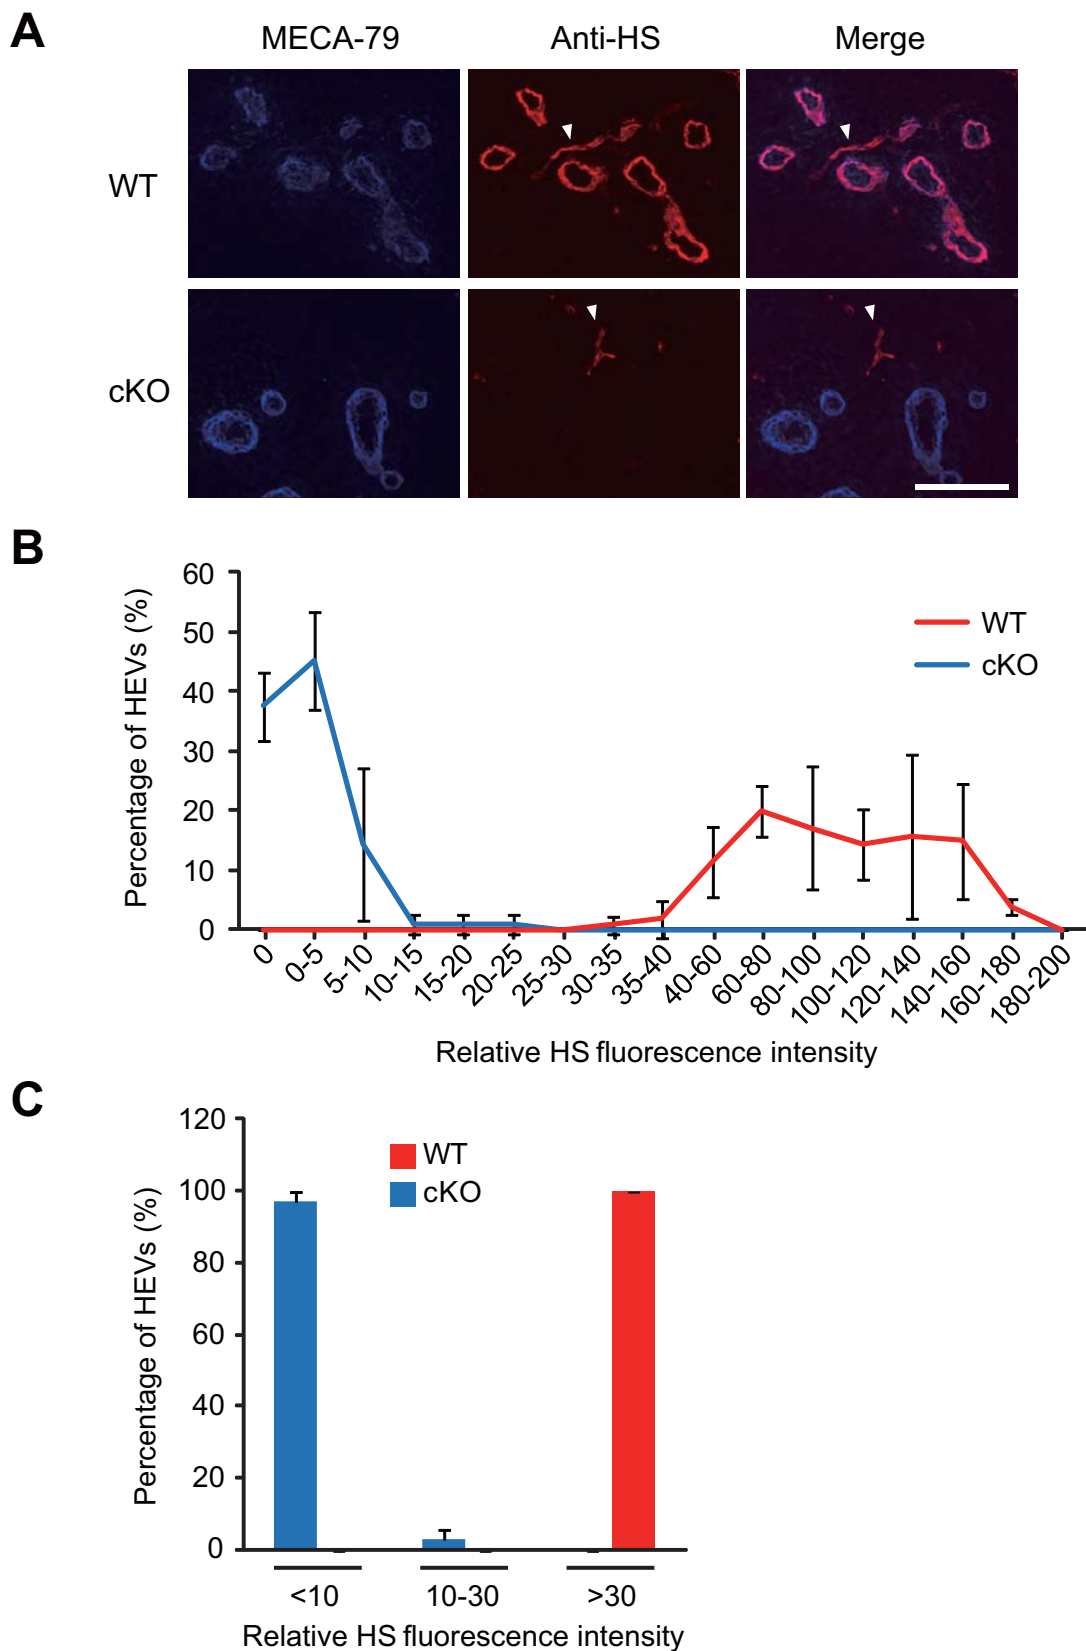

**Figure S1. Quantitative analysis of HS expression in PLN HEVs in WT and cKO mice.**

(A) Immunofluorescence staining of the PLN sections from the WT and cKO mice with MECA-79 (blue) and anti-HS mAb (red). For quantitative analysis, the area and fluorescence intensity of each MECA-79<sup>+</sup> HEV were measured with the fluorescence microscope, BZ-9000, and the HS fluorescence intensities per 1  $\mu\text{m}^2$  HEVs were calculated. The arrowheads denote the MECA-79<sup>-</sup> blood vessels. Scale bar, 100  $\mu\text{m}$ . (B, C) Percentage of MECA-79<sup>+</sup> HEVs with the categorized relative HS fluorescence intensities. The mean HS fluorescence intensities per 1  $\mu\text{m}^2$  HEVs in the WT mice was set as 100, and the relative HS fluorescence intensities per 1  $\mu\text{m}^2$  HEVs were categorized into the different grades shown in the x-axis. The values represent the mean  $\pm$  SD. (C) The relative HS fluorescence intensities per 1  $\mu\text{m}^2$  HEVs were further categorized into three grades: less than 10% (<10), 10 to 30% (10-30) and greater than 30% (>30). Each bar represents the mean  $\pm$  SD ( $n = 3$ ). The data are representative of three independent experiments.
