# Supplementary material
Source: PubMed Central journal article supplement (PMC3694755)
Supplement: NIHMS477924-supplement-2.pdf [file NIHMS477924-supplement-2.pdf]

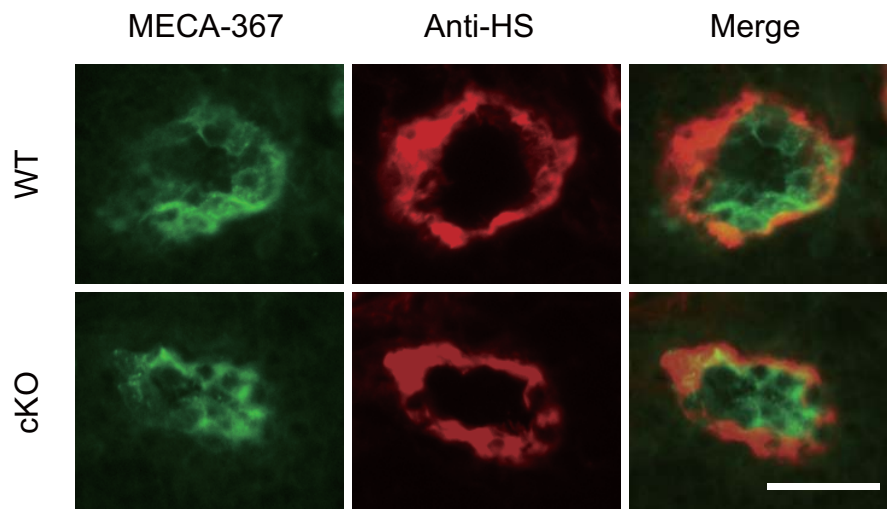

**Figure S2. Expression of HS in PP HEVs.**

Frozen sections of the PPs from the WT and cKO mice were stained with MECA-367 (*green*) and an anti-HS mAb (*red*). Scale bar, 25  $\mu$ m. The data are representative of three independent experiments.
