# Supplementary material
Source: PubMed Central journal article supplement (PMC3694755)
Supplement: NIHMS477924-supplement-3.pdf [file NIHMS477924-supplement-3.pdf]

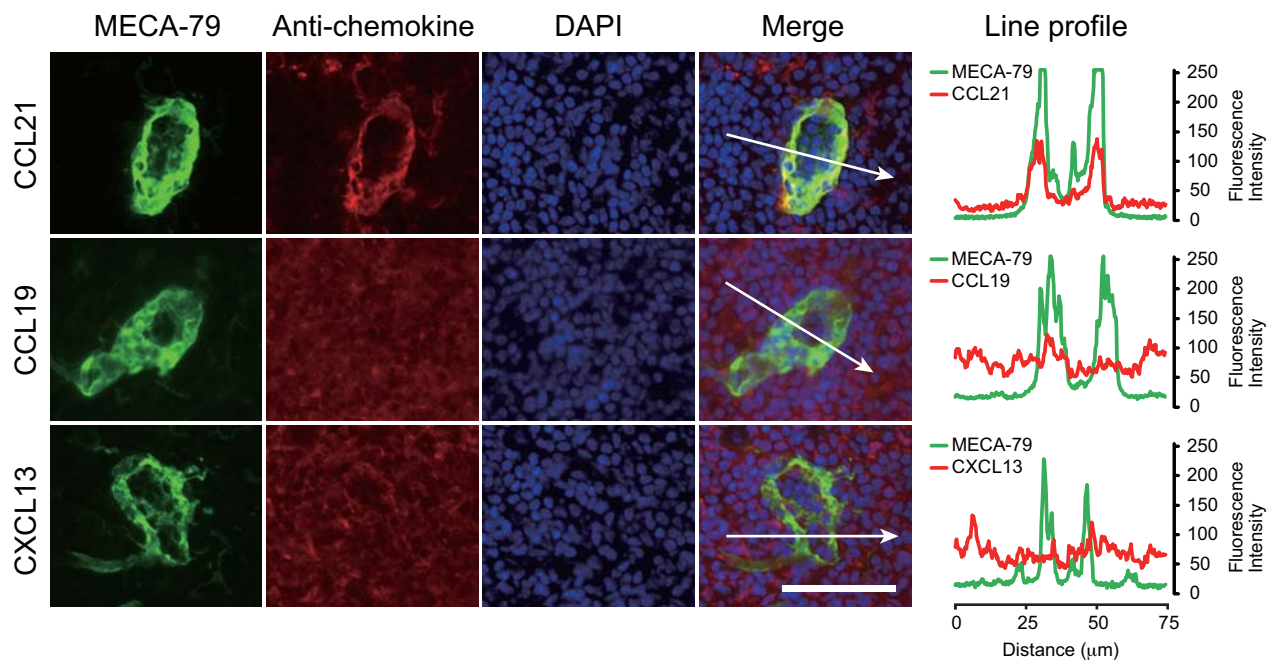

**Figure S3. Expression of chemokines in PLNs of WT mice.**

Frozen sections of PLNs were stained with polyclonal antibodies against CCL21, CCL19 or CXCL13 (*red*) and MECA-79 (*green*). Nuclear staining was performed with DAPI (*blue*). The profile of the fluorescence intensity along the white arrow in each merged image is shown on the right. Note that CCL21 but not the other chemokines accumulated in MECA-79-reactive HEVs. Scale bar, 50  $\mu\text{m}$ . The data are representative of three independent experiments.
